# Supplementary material for: Ecotype-Specific and Correlated Seasonal Responses of Biomass Production, Non-Structural Carbohydrates, and Fatty Acids in Zostera marina
Source: MDPI journal article supplement (doi:10.3390/plants13030396), 2024-01-29
Supplement: s1 [file s1]

## Supplementary material

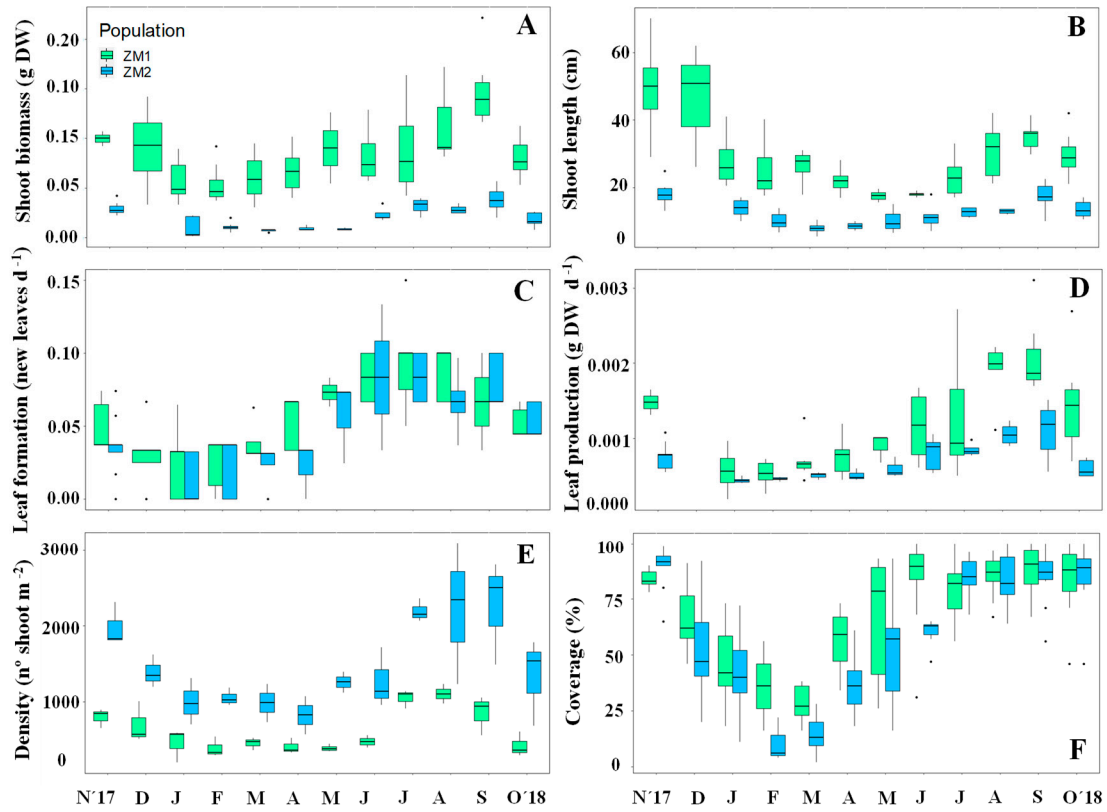

**Figure S1:** Seasonal trends of: (A) shoot biomass (g DW shoot<sup>-1</sup>); (B) shoot length (cm); (C) leaf formation (new leaves d<sup>-1</sup>); (D) leaf biomass production (g DW d<sup>-1</sup> shoot<sup>-1</sup>); (E) shoot density (n° shoot m<sup>-2</sup>); and (F) coverage (%) of *Zostera marina* from Ireland. Data represented as mean  $\pm$  SD (n=3-13). For ZM1, data was extracted from Azcárate-García et al. (2022). Black points are considered outliers.

**Table S1.** Monthly results of mean shoot biomass, mean shoot length, mean leaf formation, mean leaf production, mean density and mean cover of two Irish ecotypes of *Zostera marina* (ZM1 and ZM2). Data represented as mean  $\pm$  SD (n=3-13). For ZM1, data was extracted from Azcárate-García et al. (2022).

| Month | Ecotype | Shoot biomass<br>(g DW shoot <sup>-1</sup> ) | Shoot length<br>(cm) | Leaf formation<br>(N° of new leaves d <sup>-1</sup> ) | Leaf biomass production<br>(g DW d <sup>-1</sup> shoot <sup>-1</sup> ) | Density<br>(shoot m <sup>-2</sup> ) | Cover<br>(%)      |
|-------|---------|----------------------------------------------|----------------------|-------------------------------------------------------|------------------------------------------------------------------------|-------------------------------------|-------------------|
| Nov   | ZM1     | 0.10 $\pm$ 0.0061                            | 29.75 $\pm$ 0.61     | 0.048 $\pm$ 0.017                                     | 0.0015 $\pm$ 0.00014                                                   | 800.00 $\pm$ 103.6                  | 84.25 $\pm$ 3.54  |
|       | ZM2     | 0.029 $\pm$ 0.0057                           | 18.09 $\pm$ 3.02     | 0.033 $\pm$ 0.020                                     | 0.00075 $\pm$ 0.00016                                                  | 1978.67 $\pm$ 230.1                 | 89.75 $\pm$ 8.74  |
| Dec   | ZM1     | 0.16 $\pm$ 0.086                             | 46.51 $\pm$ 12.39    | 0.029 $\pm$ 0.020                                     | -                                                                      | 698.67 $\pm$ 220.2                  | 66.91 $\pm$ 13.44 |
|       | ZM2     | -                                            | -                    | -                                                     | -                                                                      | 1386.67 $\pm$ 172.4                 | 51.27 $\pm$ 18.38 |
| Jan   | ZM1     | 0.056 $\pm$ 0.018                            | 27.7 $\pm$ 6.82      | 0.023 $\pm$ 0.021                                     | 0.00057 $\pm$ 0.00022                                                  | 458.67 $\pm$ 177.37                 | 44.86 $\pm$ 15.01 |
|       | ZM2     | 0.010 $\pm$ 0.0097                           | 13.91 $\pm$ 2.54     | 0.014 $\pm$ 0.016                                     | 0.00044 $\pm$ 0.00003                                                  | 997.33 $\pm$ 248.67                 | 41.13 $\pm$ 18.95 |
| Feb   | ZM1     | 0.053 $\pm$ 0.017                            | 25.63 $\pm$ 7.87     | 0.026 $\pm$ 0.017                                     | 0.00054 $\pm$ 0.00014                                                  | 394.67 $\pm$ 106.40                 | 36.00 $\pm$ 16.33 |
|       | ZM2     | 0.011 $\pm$ 0.0043                           | 10.10 $\pm$ 2.52     | 0.021 $\pm$ 0.018                                     | 0.00046 $\pm$ 0.00002                                                  | 1056.00 $\pm$ 94.21                 | 10.67 $\pm$ 8.06  |
| Mar   | ZM1     | 0.061 $\pm$ 0.021                            | 26.49 $\pm$ 4.09     | 0.039 $\pm$ 0.014                                     | 0.00070 $\pm$ 0.00023                                                  | 458.67 $\pm$ 67.04                  | 28.22 $\pm$ 7.39  |
|       | ZM2     | 0.007 $\pm$ 0.0011                           | 7.90 $\pm$ 1.74      | 0.023 $\pm$ 0.013                                     | 0.00050 $\pm$ 0.00004                                                  | 986.67 $\pm$ 202.53                 | 14.50 $\pm$ 7.62  |
| Apr   | ZM1     | 0.067 $\pm$ 0.020                            | 21.98 $\pm$ 3.44     | 0.052 $\pm$ 0.017                                     | 0.00076 $\pm$ 0.00023                                                  | 410.67 $\pm$ 83.99                  | 57.00 $\pm$ 11.75 |
|       | ZM2     | 0.009 $\pm$ 0.0023                           | 8.57 $\pm$ 1.14      | 0.022 $\pm$ 0.016                                     | 0.00051 $\pm$ 0.00007                                                  | 826.67 $\pm$ 202.53                 | 35.38 $\pm$ 11.53 |
| May   | ZM1     | 0.090 $\pm$ 0.029                            | 17.50 $\pm$ 1.63     | 0.073 $\pm$ 0.000                                     | 0.00090 $\pm$ 0.00016                                                  | 394.67 $\pm$ 39.91                  | 66.10 $\pm$ 25.05 |
|       | ZM2     | 0.008 $\pm$ 0.0012                           | 10.23 $\pm$ 3.55     | 0.057 $\pm$ 0.023                                     | 0.00060 $\pm$ 0.00011                                                  | 1258.67 $\pm$ 111.11                | 51.10 $\pm$ 22.53 |
| Jun   | ZM1     | 0.083 $\pm$ 0.028                            | 18.00 $\pm$ 0.71     | 0.083 $\pm$ 0.017                                     | 0.0012 $\pm$ 0.00044                                                   | 480.00 $\pm$ 65.32                  | 84.58 $\pm$ 18.23 |
|       | ZM2     | 0.023 $\pm$ 0.0061                           | 11.50 $\pm$ 3.66     | 0.083 $\pm$ 0.037                                     | 0.00080 $\pm$ 0.0002                                                   | 1269.33 $\pm$ 321.15                | 60.00 $\pm$ 5.83  |
| Jul   | ZM1     | 0.089 $\pm$ 0.042                            | 23.25 $\pm$ 5.64     | 0.094 $\pm$ 0.012                                     | 0.0013 $\pm$ 0.00077                                                   | 1050.67 $\pm$ 98.92                 | 79.30 $\pm$ 13.09 |
|       | ZM2     | 0.031 $\pm$ 0.0077                           | 12.63 $\pm$ 1.38     | 0.083 $\pm$ 0.017                                     | 0.00085 $\pm$ 0.00008                                                  | 2186.67 $\pm$ 121.38                | 85.10 $\pm$ 7.97  |
| Aug   | ZM1     | 0.11 $\pm$ 0.034                             | 30.92 $\pm$ 7.76     | 0.087 $\pm$ 0.016                                     | 0.0019 $\pm$ 0.00039                                                   | 1104.00 $\pm$ 104.51                | 85.67 $\pm$ 10.66 |
|       | ZM2     | 0.028 $\pm$ 0.0041                           | 12.90 $\pm$ 0.70     | 0.067 $\pm$ 0.000                                     | 0.0011 $\pm$ 0.00014                                                   | 2218.67 $\pm$ 762.24                | 84.20 $\pm$ 10.73 |
| Sept  | ZM1     | 0.15 $\pm$ 0.034                             | 34.94 $\pm$ 3.76     | 0.067 $\pm$ 0.025                                     | 0.0021 $\pm$ 0.00047                                                   | 853.33 $\pm$ 212.40                 | 88.75 $\pm$ 9.55  |
|       | ZM2     | 0.038 $\pm$ 0.011                            | 17.47 $\pm$ 3.67     | 0.080 $\pm$ 0.016                                     | 0.0011 $\pm$ 0.0003                                                    | 2261.33 $\pm$ 560.74                | 84.60 $\pm$ 11.93 |
| Oct   | ZM1     | 0.080 $\pm$ 0.018                            | 29.60 $\pm$ 5.70     | 0.051 $\pm$ 0.010                                     | 0.0014 $\pm$ 0.00054                                                   | 426.67 $\pm$ 130.86                 | 84.64 $\pm$ 15.32 |
|       | ZM2     | 0.018 $\pm$ 0.0069                           | 13.52 $\pm$ 2.41     | 0.053 $\pm$ 0.011                                     | 0.00060 $\pm$ 0.0001                                                   | 1333.33 $\pm$ 466.72                | 84.80 $\pm$ 14.34 |

**Table S2.** Monthly results of mean total leaf area, leaf production and leaf area index of two Irish ecotypes of *Zostera marina* (ZM1 and ZM2). Data represented as mean  $\pm$  SD (n=3-13).

|      | Ecotype | Total leaf area<br>(cm <sup>2</sup> shoot <sup>-1</sup> ) | Leaf biomass production<br>(g DW d <sup>-1</sup> shoot <sup>-1</sup> ) | Leaf area index        |
|------|---------|-----------------------------------------------------------|------------------------------------------------------------------------|------------------------|
| Nov  | ZM1     | 12.71 $\pm$ 2.68                                          | 0.0015 $\pm$ 0.00014                                                   | 10168.00 $\pm$ 1317.92 |
|      | ZM2     | 2.07 $\pm$ 0.9                                            | 0.00075 $\pm$ 0.00016                                                  | 4104.98 $\pm$ 477.45   |
| Dec  | ZM1     | 7.55 $\pm$ 1.22                                           | -                                                                      | 5277.26 $\pm$ 1663.90  |
|      | ZM2     | -                                                         | -                                                                      | -                      |
| Jan  | ZM1     | 3.33 $\pm$ 1.76                                           | 0.00057 $\pm$ 0.00022                                                  | 1099.27 $\pm$ 425.09   |
|      | ZM2     | 0.39 $\pm$ 0.06                                           | 0.00044 $\pm$ 0.00003                                                  | 392.52 $\pm$ 97.87     |
| Feb  | ZM1     | 1.66 $\pm$ 0.97                                           | 0.00054 $\pm$ 0.00014                                                  | 655.30 $\pm$ 176.67    |
|      | ZM2     | 0.25 $\pm$ 0.10                                           | 0.00046 $\pm$ 0.00002                                                  | 267.70 $\pm$ 23.88     |
| Mar  | ZM1     | 2.73 $\pm$ 1.61                                           | 0.00070 $\pm$ 0.00023                                                  | 1250.73 $\pm$ 182.81   |
|      | ZM2     | 0.37 $\pm$ 0.07                                           | 0.00050 $\pm$ 0.00004                                                  | 364.57 $\pm$ 74.83     |
| Apr  | ZM1     | 3.68 $\pm$ 1.29                                           | 0.00076 $\pm$ 0.00023                                                  | 1511.71 $\pm$ 309.17   |
|      | ZM2     | 0.48 $\pm$ 0.13                                           | 0.00051 $\pm$ 0.00007                                                  | 394.32 $\pm$ 96.61     |
| May  | ZM1     | 5.90 $\pm$ 0.88                                           | 0.00090 $\pm$ 0.00016                                                  | 2330.40 $\pm$ 235.66   |
|      | ZM2     | 0.85 $\pm$ 0.38                                           | 0.00060 $\pm$ 0.00011                                                  | 1065.67 $\pm$ 94.07    |
| Jun  | ZM1     | 8.23 $\pm$ 3.91                                           | 0.0012 $\pm$ 0.00044                                                   | 3952.03 $\pm$ 537.80   |
|      | ZM2     | 2.06 $\pm$ 0.65                                           | 0.00080 $\pm$ 0.0002                                                   | 2614.76 $\pm$ 661.56   |
| Jul  | ZM1     | 11.93 $\pm$ 1.28                                          | 0.0013 $\pm$ 0.00077                                                   | 12534.80 $\pm$ 1180.13 |
|      | ZM2     | 3.15 $\pm$ 1.24                                           | 0.00085 $\pm$ 0.00008                                                  | 6893.47 $\pm$ 382.66   |
| Aug  | ZM1     | 11.60 $\pm$ 3.06                                          | 0.0019 $\pm$ 0.00039                                                   | 12808.25 $\pm$ 1212.51 |
|      | ZM2     | 3.31 $\pm$ 0.59                                           | 0.0011 $\pm$ 0.00014                                                   | 7352.11 $\pm$ 2525.86  |
| Sept | ZM1     | 15.46 $\pm$ 7.23                                          | 0.0021 $\pm$ 0.00047                                                   | 13194.73 $\pm$ 3284.22 |
|      | ZM2     | 5.42 $\pm$ 2.28                                           | 0.0011 $\pm$ 0.0003                                                    | 12259.82 $\pm$ 3040.03 |
| Oct  | ZM1     | 14.78 $\pm$ 1.91                                          | 0.0014 $\pm$ 0.00054                                                   | 6306.09 $\pm$ 1934.05  |
|      | ZM2     | 2.87 $\pm$ 1.40                                           | 0.00060 $\pm$ 0.0001                                                   | 3831.73 $\pm$ 1341.26  |

**Table S3.** Monthly results of carbohydrates (sucrose and starch) contents in leaves of two Irish ecotypes of *Zostera marina* (ZM1 and ZM2). Data represented as mean  $\pm$  SD (n=3).

| Month | Ecotype | Sucrose<br>(mg g <sup>-1</sup> DW) | Starch<br>(mg g <sup>-1</sup> DW) |
|-------|---------|------------------------------------|-----------------------------------|
| Nov   | ZM1     | 60.79 $\pm$ 24.67                  | 33.36 $\pm$ 12.10                 |
|       | ZM2     | 69.71 $\pm$ 21.59                  | 18.10 $\pm$ 4.26                  |
| Dec   | ZM1     | 37.88 $\pm$ 3.78                   | 40.12 $\pm$ 6.40                  |
|       | ZM2     | 6.94 $\pm$ 2.88                    | 7.92 $\pm$ 7.2                    |
| Jan   | ZM1     | 49.60 $\pm$ 2.11                   | 55.64 $\pm$ 17.57                 |
|       | ZM2     | 85.61 $\pm$ 8.90                   | 28.99 $\pm$ 3.36                  |
| Feb   | ZM1     | 23.31 $\pm$ 10.66                  | 39.52 $\pm$ 6.35                  |
|       | ZM2     | 62.29 $\pm$ 7.16                   | 26.15 $\pm$ 0.59                  |
| Mar   | ZM1     | 52.56 $\pm$ 8.19                   | 54.93 $\pm$ 5.92                  |
|       | ZM2     | 54.18 $\pm$ 7.69                   | 42.01 $\pm$ 5.48                  |
| Apr   | ZM1     | 51.81 $\pm$ 3.25                   | 57.23 $\pm$ 3.28                  |
|       | ZM2     | 80.33 $\pm$ 6.27                   | 43.43 $\pm$ 5.77                  |
| May   | ZM1     | 122.16 $\pm$ 5.80                  | 59.13 $\pm$ 1.20                  |
|       | ZM2     | 150.78 $\pm$ 7.35                  | 31.74 $\pm$ 12.56                 |
| Jun   | ZM1     | 69.72 $\pm$ 12.11                  | 67.50 $\pm$ 5.90                  |
|       | ZM2     | 100.53 $\pm$ 6.45                  | 25.41 $\pm$ 4.30                  |
| Jul   | ZM1     | 115.48 $\pm$ 3.16                  | 66.82 $\pm$ 2.43                  |
|       | ZM2     | 140.63 $\pm$ 6.48                  | 26.80 $\pm$ 9.12                  |
| Aug   | ZM1     | 135.78 $\pm$ 20.10                 | 70.60 $\pm$ 3.75                  |
|       | ZM2     | 173.29 $\pm$ 4.12                  | 39.78 $\pm$ 14.97                 |
| Sept  | ZM1     | 118.01 $\pm$ 7.10                  | 72.10 $\pm$ 3.50                  |
|       | ZM2     | 123.01 $\pm$ 15.23                 | 31.05 $\pm$ 6.82                  |
| Oct   | ZM1     | 123.24 $\pm$ 6.41                  | 53.51 $\pm$ 11.79                 |
|       | ZM2     | 106.24 $\pm$ 2.13                  | 26.70 $\pm$ 3.26                  |

**Table S4.** Monthly results of total fatty acids (TFA), monounsaturated fatty acids (MUFA), polyunsaturated fatty acids (PUFA), saturated fatty acids (SFA) contents in leaves of two Irish ecotypes of *Zostera marina* (ZM1 and ZM2). Data represented as mean  $\pm$  SD (n=3-4).

| %FA                  | Ecotype    | Nov            | Dec            | Jan            | Feb            | Mar            | Apr            | May            | Jun            | Jul            | Aug            | Sep            | Oct            |
|----------------------|------------|----------------|----------------|----------------|----------------|----------------|----------------|----------------|----------------|----------------|----------------|----------------|----------------|
| <b>SFA</b>           | <b>ZM1</b> | 19.2 $\pm$ 0.5 | 19.3 $\pm$ 1.4 | 14.5 $\pm$ 0.4 | 16.8 $\pm$ 0.5 | 15.7 $\pm$ 0.7 | 16.2 $\pm$ 0.4 | 20.6 $\pm$ 1.0 | 19.7 $\pm$ 0.8 | 24.3 $\pm$ 1.3 | 21.6 $\pm$ 1.5 | 25.8 $\pm$ 2.1 | 18.8 $\pm$ 2.1 |
| <b>16:0</b>          | <b>ZM1</b> | 18.3 $\pm$ 0.5 | 18.4 $\pm$ 1.3 | 13.9 $\pm$ 0.4 | 16.0 $\pm$ 0.5 | 14.9 $\pm$ 0.6 | 15.5 $\pm$ 0.4 | 19.5 $\pm$ 0.9 | 18.6 $\pm$ 0.8 | 22.9 $\pm$ 1.2 | 20.3 $\pm$ 1.4 | 24.5 $\pm$ 2.0 | 17.8 $\pm$ 1.3 |
| <b>18:0</b>          | <b>ZM1</b> | 0.9 $\pm$ 0.0  | 0.8 $\pm$ 0.1  | 0.5 $\pm$ 0.0  | 0.8 $\pm$ 0.0  | 0.8 $\pm$ 0.1  | 0.7 $\pm$ 0.0  | 1.1 $\pm$ 0.1  | 1.1 $\pm$ 0.1  | 1.4 $\pm$ 0.1  | 1.3 $\pm$ 0.1  | 1.3 $\pm$ 0.1  | 1.0 $\pm$ 0.1  |
| <b>MUFA</b>          | <b>ZM1</b> | 3.2 $\pm$ 0.1  | 3.9 $\pm$ 0.6  | 2.7 $\pm$ 0.1  | 3.3 $\pm$ 0.1  | 4.1 $\pm$ 0.1  | 4.4 $\pm$ 0.1  | 5.3 $\pm$ 0.2  | 4.1 $\pm$ 0.5  | 3.7 $\pm$ 0.6  | 4.4 $\pm$ 0.3  | 4.1 $\pm$ 0.6  | 3.8 $\pm$ 0.6  |
| <b>14:1</b>          | <b>ZM1</b> | 0.7 $\pm$ 0.1  | 0.7 $\pm$ 0.1  | 0.7 $\pm$ 0.1  | 0.7 $\pm$ 0.1  | 0.6 $\pm$ 0.0  | 0.7 $\pm$ 0.1  | 0.7 $\pm$ 0.0  | 0.7 $\pm$ 0.0  | 0.8 $\pm$ 0.1  | 0.7 $\pm$ 0.1  | 0.9 $\pm$ 0.1  | 0.9 $\pm$ 0.1  |
| <b>16:1 n-7</b>      | <b>ZM1</b> | 1.1 $\pm$ 0.1  | 2.1 $\pm$ 0.4  | 1.3 $\pm$ 0.1  | 1.7 $\pm$ 0.1  | 2.6 $\pm$ 0.1  | 2.6 $\pm$ 0.1  | 3.2 $\pm$ 0.2  | 2.0 $\pm$ 0.6  | 1.3 $\pm$ 0.4  | 1.8 $\pm$ 0.2  | 1.4 $\pm$ 0.4  | 1.6 $\pm$ 0.2  |
| <b>18:1 n-7</b>      | <b>ZM1</b> | 0.4 $\pm$ 0.0  | 0.5 $\pm$ 0.1  | 0.3 $\pm$ 0.0  | 0.3 $\pm$ 0.0  | 0.4 $\pm$ 0.0  | 0.5 $\pm$ 0.0  | 0.6 $\pm$ 0.0  | 0.6 $\pm$ 0.0  | 0.5 $\pm$ 0.1  | 0.6 $\pm$ 0.1  | 0.6 $\pm$ 0.1  | 0.5 $\pm$ 0.0  |
| <b>18:1 n-9</b>      | <b>ZM1</b> | 0.9 $\pm$ 0.0  | 0.6 $\pm$ 0.1  | 0.5 $\pm$ 0.0  | 0.5 $\pm$ 0.0  | 0.5 $\pm$ 0.1  | 0.6 $\pm$ 0.0  | 0.8 $\pm$ 0.1  | 0.8 $\pm$ 0.1  | 1.1 $\pm$ 0.1  | 1.2 $\pm$ 0.2  | 1.2 $\pm$ 0.1  | 0.8 $\pm$ 0.1  |
| <b>PUFA</b>          | <b>ZM1</b> | 72.3 $\pm$ 0.6 | 71.5 $\pm$ 2.5 | 79.4 $\pm$ 0.7 | 75.9 $\pm$ 0.7 | 76.4 $\pm$ 0.6 | 74.6 $\pm$ 0.6 | 70.2 $\pm$ 1.4 | 72.1 $\pm$ 0.3 | 68.8 $\pm$ 2.2 | 68.5 $\pm$ 1.9 | 64.6 $\pm$ 3.4 | 72.6 $\pm$ 3.4 |
| <b>16:3 n-3</b>      | <b>ZM1</b> | 9.0 $\pm$ 0.3  | 8.5 $\pm$ 0.9  | 11.3 $\pm$ 0.3 | 10.0 $\pm$ 0.4 | 10.0 $\pm$ 0.7 | 9.8 $\pm$ 0.5  | 7.1 $\pm$ 0.5  | 7.4 $\pm$ 0.4  | 5.2 $\pm$ 0.6  | 6.5 $\pm$ 0.7  | 5.1 $\pm$ 1.1  | 8.4 $\pm$ 0.6  |
| <b>16:3 n-4</b>      | <b>ZM1</b> | 0.3 $\pm$ 0.0  | 0.2 $\pm$ 0.0  | 0.2 $\pm$ 0.0  | 0.2 $\pm$ 0.0  | 0.2 $\pm$ 0.0  | 0.3 $\pm$ 0.0  | 0.3 $\pm$ 0.0  | 0.6 $\pm$ 0.0  | 0.6 $\pm$ 0.0  | 0.4 $\pm$ 0.1  | 0.4 $\pm$ 0.0  | 0.3 $\pm$ 0.0  |
| <b>18:2 n-6</b>      | <b>ZM1</b> | 15.0 $\pm$ 0.3 | 13.8 $\pm$ 0.6 | 11.4 $\pm$ 0.3 | 10.8 $\pm$ 0.1 | 11.0 $\pm$ 0.6 | 10.0 $\pm$ 0.5 | 13.7 $\pm$ 0.2 | 14.9 $\pm$ 1.7 | 20.0 $\pm$ 0.7 | 15.3 $\pm$ 0.9 | 16.8 $\pm$ 0.5 | 14.6 $\pm$ 0.6 |
| <b>18:3 n-3</b>      | <b>ZM1</b> | 48.1 $\pm$ 0.3 | 49.0 $\pm$ 2.2 | 56.6 $\pm$ 0.4 | 55.0 $\pm$ 0.6 | 55.3 $\pm$ 0.7 | 54.5 $\pm$ 0.4 | 49.1 $\pm$ 0.9 | 49.1 $\pm$ 1.2 | 42.9 $\pm$ 1.1 | 46.3 $\pm$ 2.0 | 42.3 $\pm$ 2.3 | 49.3 $\pm$ 1.9 |
| <b>Others</b>        | <b>ZM1</b> | 5.3 $\pm$ 0.3  | 5.4 $\pm$ 0.7  | 3.4 $\pm$ 0.3  | 4.0 $\pm$ 0.2  | 3.7 $\pm$ 0.1  | 4.8 $\pm$ 0.5  | 3.9 $\pm$ 0.3  | 4.1 $\pm$ 0.3  | 3.2 $\pm$ 0.4  | 5.5 $\pm$ 0.7  | 5.5 $\pm$ 1.0  | 4.8 $\pm$ 0.5  |
| <b>TFA</b>           | <b>ZM1</b> | 2.6 $\pm$ 0.1  | 2.7 $\pm$ 0.2  | 2.9 $\pm$ 0.0  | 2.7 $\pm$ 0.1  | 2.8 $\pm$ 0.2  | 2.8 $\pm$ 0.2  | 1.8 $\pm$ 0.2  | 2.4 $\pm$ 0.1  | 1.5 $\pm$ 0.1  | 1.8 $\pm$ 0.1  | 1.5 $\pm$ 0.2  | 2.3 $\pm$ 0.1  |
| <b>PUFA/SFA</b>      | <b>ZM1</b> | 3.8 $\pm$ 0.1  | 3.7 $\pm$ 0.4  | 5.5 $\pm$ 0.2  | 4.5 $\pm$ 0.2  | 4.9 $\pm$ 0.3  | 4.6 $\pm$ 0.1  | 3.4 $\pm$ 0.2  | 3.7 $\pm$ 0.2  | 2.8 $\pm$ 0.2  | 3.2 $\pm$ 0.3  | 2.5 $\pm$ 0.4  | 3.9 $\pm$ 0.4  |
| <b>Omega 3/6</b>     | <b>ZM1</b> | 3.8 $\pm$ 0.1  | 4.2 $\pm$ 0.4  | 6.0 $\pm$ 0.2  | 6.0 $\pm$ 0.1  | 5.9 $\pm$ 0.5  | 6.4 $\pm$ 0.3  | 4.1 $\pm$ 0.1  | 3.9 $\pm$ 0.6  | 2.4 $\pm$ 0.1  | 3.5 $\pm$ 0.4  | 2.8 $\pm$ 0.2  | 4.0 $\pm$ 0.3  |
| <b>18:3 n-3/16:0</b> | <b>ZM1</b> | 2.6 $\pm$ 0.1  | 2.7 $\pm$ 0.3  | 4.1 $\pm$ 0.1  | 3.4 $\pm$ 0.1  | 3.7 $\pm$ 0.2  | 3.5 $\pm$ 0.1  | 2.5 $\pm$ 0.2  | 2.6 $\pm$ 0.2  | 1.9 $\pm$ 0.1  | 2.3 $\pm$ 0.3  | 1.7 $\pm$ 0.3  | 2.8 $\pm$ 0.3  |
| <b>SFA</b>           | <b>ZM2</b> | 20.0 $\pm$ 0.5 | 19.5 $\pm$ 0.6 | 15.0 $\pm$ 0.3 | 17.8 $\pm$ 0.8 | 16.3 $\pm$ 0.2 | 16.5 $\pm$ 0.5 | 16.4 $\pm$ 0.2 | 19.8 $\pm$ 0.9 | 21.4 $\pm$ 0.4 | 24.9 $\pm$ 1.1 | 21.6 $\pm$ 1.7 | 17.0 $\pm$ 0.0 |
| <b>16:0</b>          | <b>ZM2</b> | 19.0 $\pm$ 0.5 | 18.7 $\pm$ 0.6 | 14.4 $\pm$ 0.2 | 17.0 $\pm$ 0.8 | 15.5 $\pm$ 0.2 | 15.7 $\pm$ 0.5 | 15.6 $\pm$ 0.2 | 18.6 $\pm$ 0.9 | 20.1 $\pm$ 0.4 | 23.4 $\pm$ 1.1 | 20.5 $\pm$ 1.6 | 16.2 $\pm$ 0.1 |
| <b>18:0</b>          | <b>ZM2</b> | 1.0 $\pm$ 0.0  | 0.9 $\pm$ 0.0  | 0.6 $\pm$ 0.0  | 0.8 $\pm$ 0.0  | 0.7 $\pm$ 0.0  | 0.8 $\pm$ 0.0  | 0.9 $\pm$ 0.0  | 1.3 $\pm$ 0.1  | 1.3 $\pm$ 0.0  | 1.5 $\pm$ 0.0  | 1.1 $\pm$ 0.1  | 0.8 $\pm$ 0.1  |
| <b>MUFA</b>          | <b>ZM2</b> | 4.1 $\pm$ 0.2  | 4.3 $\pm$ 0.3  | 2.6 $\pm$ 0.1  | 2.5 $\pm$ 0.4  | 2.7 $\pm$ 0.2  | 2.8 $\pm$ 0.2  | 2.4 $\pm$ 0.2  | 2.3 $\pm$ 0.2  | 2.5 $\pm$ 0.2  | 3.9 $\pm$ 0.2  | 3.8 $\pm$ 0.3  | 1.9 $\pm$ 0.2  |
| <b>14:1</b>          | <b>ZM2</b> | 1.1 $\pm$ 0.0  | 0.8 $\pm$ 0.1  | 0.8 $\pm$ 0.1  | 0.8 $\pm$ 0.0  | 0.7 $\pm$ 0.0  | 0.6 $\pm$ 0.2  | 0.4 $\pm$ 0.0  | 0.5 $\pm$ 0.0  | 0.4 $\pm$ 0.1  | 0.5 $\pm$ 0.1  | 0.5 $\pm$ 0.1  | 0.4 $\pm$ 0.1  |
| <b>16:1 n-7</b>      | <b>ZM2</b> | 1.7 $\pm$ 0.3  | 2.2 $\pm$ 0.2  | 0.8 $\pm$ 0.1  | 0.7 $\pm$ 0.4  | 0.9 $\pm$ 0.1  | 1.1 $\pm$ 0.2  | 0.8 $\pm$ 0.2  | 0.4 $\pm$ 0.1  | 0.7 $\pm$ 0.2  | 1.4 $\pm$ 0.1  | 1.7 $\pm$ 0.2  | 0.6 $\pm$ 0.1  |
| <b>18:1 n-7</b>      | <b>ZM2</b> | 0.5 $\pm$ 0.0  | 0.5 $\pm$ 0.0  | 0.3 $\pm$ 0.0  | 0.4 $\pm$ 0.0  | 0.4 $\pm$ 0.0  | 0.4 $\pm$ 0.0  | 0.5 $\pm$ 0.0  | 0.5 $\pm$ 0.0  | 0.5 $\pm$ 0.1  | 0.7 $\pm$ 0.0  | 0.6 $\pm$ 0.0  | 0.4 $\pm$ 0.0  |
| <b>18:1 n-9</b>      | <b>ZM2</b> | 1.0 $\pm$ 0.1  | 0.8 $\pm$ 0.0  | 0.6 $\pm$ 0.0  | 0.8 $\pm$ 0.2  | 0.6 $\pm$ 0.0  | 0.8 $\pm$ 0.1  | 0.6 $\pm$ 0.1  | 0.9 $\pm$ 0.1  | 0.8 $\pm$ 0.1  | 1.3 $\pm$ 0.1  | 0.9 $\pm$ 0.1  | 0.5 $\pm$ 0.0  |
| <b>PUFA</b>          | <b>ZM2</b> | 72.9 $\pm$ 1.0 | 72.7 $\pm$ 0.9 | 80.0 $\pm$ 0.5 | 76.6 $\pm$ 1.1 | 78.4 $\pm$ 0.4 | 78.4 $\pm$ 1.0 | 79.2 $\pm$ 0.1 | 75.5 $\pm$ 1.0 | 73.8 $\pm$ 0.5 | 68.2 $\pm$ 1.4 | 71.4 $\pm$ 2.2 | 78.5 $\pm$ 0.3 |
| <b>16:3 n-3</b>      | <b>ZM2</b> | 8.5 $\pm$ 0.5  | 8.1 $\pm$ 0.2  | 10.5 $\pm$ 0.2 | 9.7 $\pm$ 0.6  | 10.0 $\pm$ 0.1 | 9.9 $\pm$ 0.2  | 9.0 $\pm$ 0.2  | 8.0 $\pm$ 0.4  | 6.9 $\pm$ 0.2  | 5.4 $\pm$ 0.4  | 7.2 $\pm$ 0.6  | 9.9 $\pm$ 0.1  |
| <b>16:3 n-4</b>      | <b>ZM2</b> | 1.6 $\pm$ 0.2  | 2.1 $\pm$ 0.0  | 1.6 $\pm$ 0.1  | 2.1 $\pm$ 0.2  | 2.9 $\pm$ 0.1  | 2.6 $\pm$ 0.2  | 1.9 $\pm$ 0.1  | 1.7 $\pm$ 0.4  | 1.5 $\pm$ 0.1  | 2.2 $\pm$ 0.2  | 1.5 $\pm$ 0.1  | 1.3 $\pm$ 0.1  |
| <b>18:2 n-6</b>      | <b>ZM2</b> | 14.9 $\pm$ 0.3 | 14.2 $\pm$ 0.3 | 12.1 $\pm$ 0.1 | 11.7 $\pm$ 0.5 | 10.7 $\pm$ 0.2 | 11.1 $\pm$ 0.4 | 12.2 $\pm$ 0.3 | 15.2 $\pm$ 0.9 | 16.9 $\pm$ 0.4 | 15.9 $\pm$ 0.5 | 14.6 $\pm$ 0.4 | 14.4 $\pm$ 0.2 |
| <b>18:3 n-3</b>      | <b>ZM2</b> | 47.9 $\pm$ 0.6 | 48.3 $\pm$ 0.7 | 55.8 $\pm$ 0.5 | 53.2 $\pm$ 1.2 | 54.8 $\pm$ 0.3 | 54.8 $\pm$ 1.2 | 56.2 $\pm$ 0.1 | 50.6 $\pm$ 1.1 | 48.5 $\pm$ 0.7 | 44.7 $\pm$ 1.6 | 48.0 $\pm$ 1.9 | 52.8 $\pm$ 0.4 |
| <b>Others</b>        | <b>ZM2</b> | 3.0 $\pm$ 0.3  | 3.5 $\pm$ 0.1  | 2.4 $\pm$ 0.2  | 3.0 $\pm$ 0.2  | 2.7 $\pm$ 0.1  | 2.3 $\pm$ 0.4  | 2.0 $\pm$ 0.1  | 2.3 $\pm$ 0.1  | 2.3 $\pm$ 0.2  | 3.0 $\pm$ 0.1  | 3.2 $\pm$ 0.2  | 2.6 $\pm$ 0.1  |
| <b>TFA</b>           | <b>ZM2</b> | 2.6 $\pm$ 0.1  | 2.5 $\pm$ 0.1  | 2.7 $\pm$ 0.1  | 2.4 $\pm$ 0.5  | 2.7 $\pm$ 0.1  | 2.7 $\pm$ 0.1  | 2.1 $\pm$ 0.1  | 2.4 $\pm$ 0.2  | 1.8 $\pm$ 0.1  | 1.6 $\pm$ 0.1  | 2.1 $\pm$ 0.2  | 2.8 $\pm$ 0.2  |
| <b>PUFA/SFA</b>      | <b>ZM2</b> | 3.7 $\pm$ 0.1  | 3.7 $\pm$ 0.2  | 5.3 $\pm$ 0.1  | 4.3 $\pm$ 0.2  | 4.8 $\pm$ 0.1  | 4.8 $\pm$ 0.2  | 4.8 $\pm$ 0.1  | 3.8 $\pm$ 0.2  | 3.5 $\pm$ 0.1  | 2.8 $\pm$ 0.2  | 3.3 $\pm$ 0.4  | 4.6 $\pm$ 0.0  |
| <b>Omega 3/6</b>     | <b>ZM2</b> | 3.8 $\pm$ 0.0  | 4.0 $\pm$ 0.1  | 5.5 $\pm$ 0.1  | 5.4 $\pm$ 0.4  | 6.1 $\pm$ 0.1  | 5.8 $\pm$ 0.3  | 5.3 $\pm$ 0.1  | 3.9 $\pm$ 0.3  | 3.3 $\pm$ 0.1  | 3.2 $\pm$ 0.2  | 3.8 $\pm$ 0.2  | 4.3 $\pm$ 0.1  |
| <b>18:3 n-3/16:0</b> | <b>ZM2</b> | 2.5 $\pm$ 0.1  | 2.6 $\pm$ 0.1  | 3.9 $\pm$ 0.1  | 3.1 $\pm$ 0.2  | 3.5 $\pm$ 0.1  | 3.5 $\pm$ 0.2  | 3.6 $\pm$ 0.0  | 2.7 $\pm$ 0.2  | 2.4 $\pm$ 0.1  | 1.9 $\pm$ 0.2  | 2.4 $\pm$ 0.2  | 3.3 $\pm$ 0.0  |

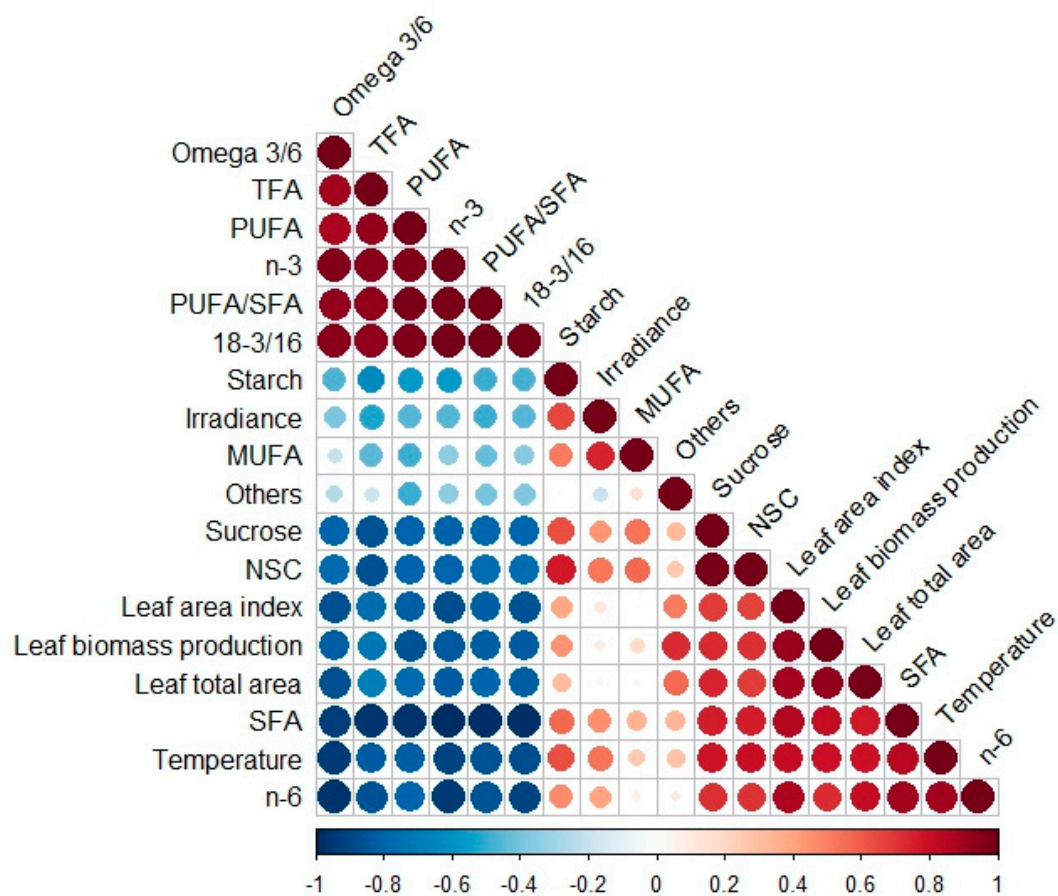

**Figure S2.** *Z. marina* ecotype (ZM1) in Galway Bay. Correlation matrix based on person Pearson's coefficient correlating seagrass descriptors, irradiance and SST. Positive correlations are represented in red and negative in blue. The higher size of the circles indicates a higher correlation between the compared variables (n=12).

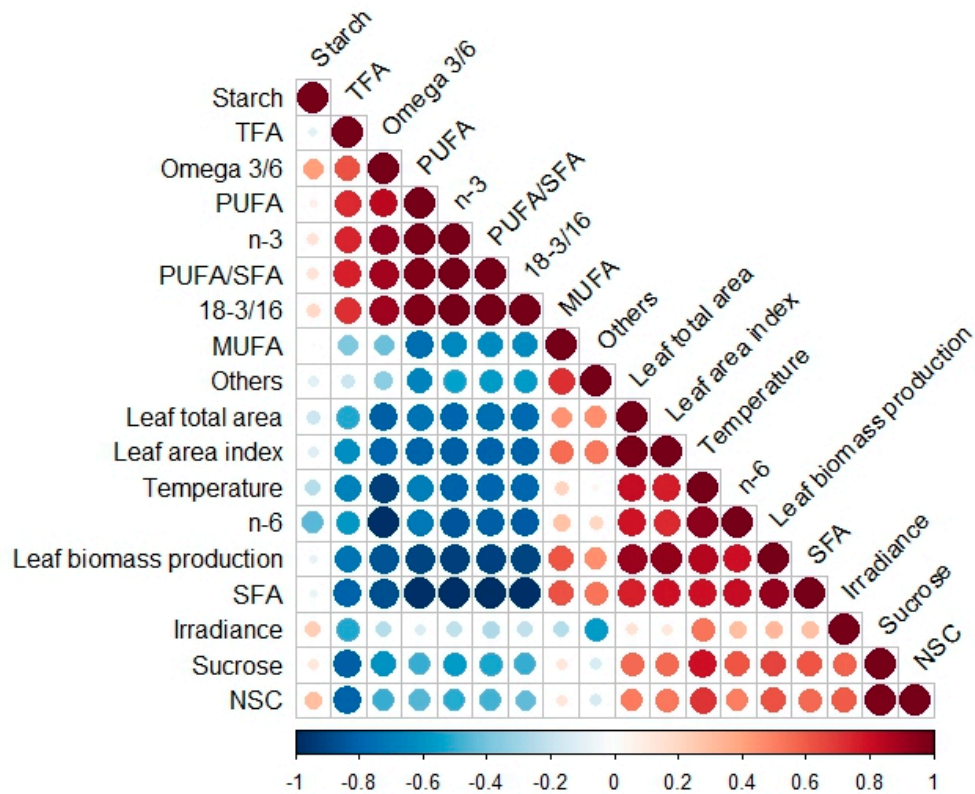

**Figure S3.** *Z. marina* ecotype (ZM2) in Galway Bay. Correlation matrix based on Pearson's coefficient correlating seagrass descriptors, irradiance and SST. Positive correlations are represented in red and negative in blue. The higher size of the circles indicates a higher correlation between the compared variables (n=12).

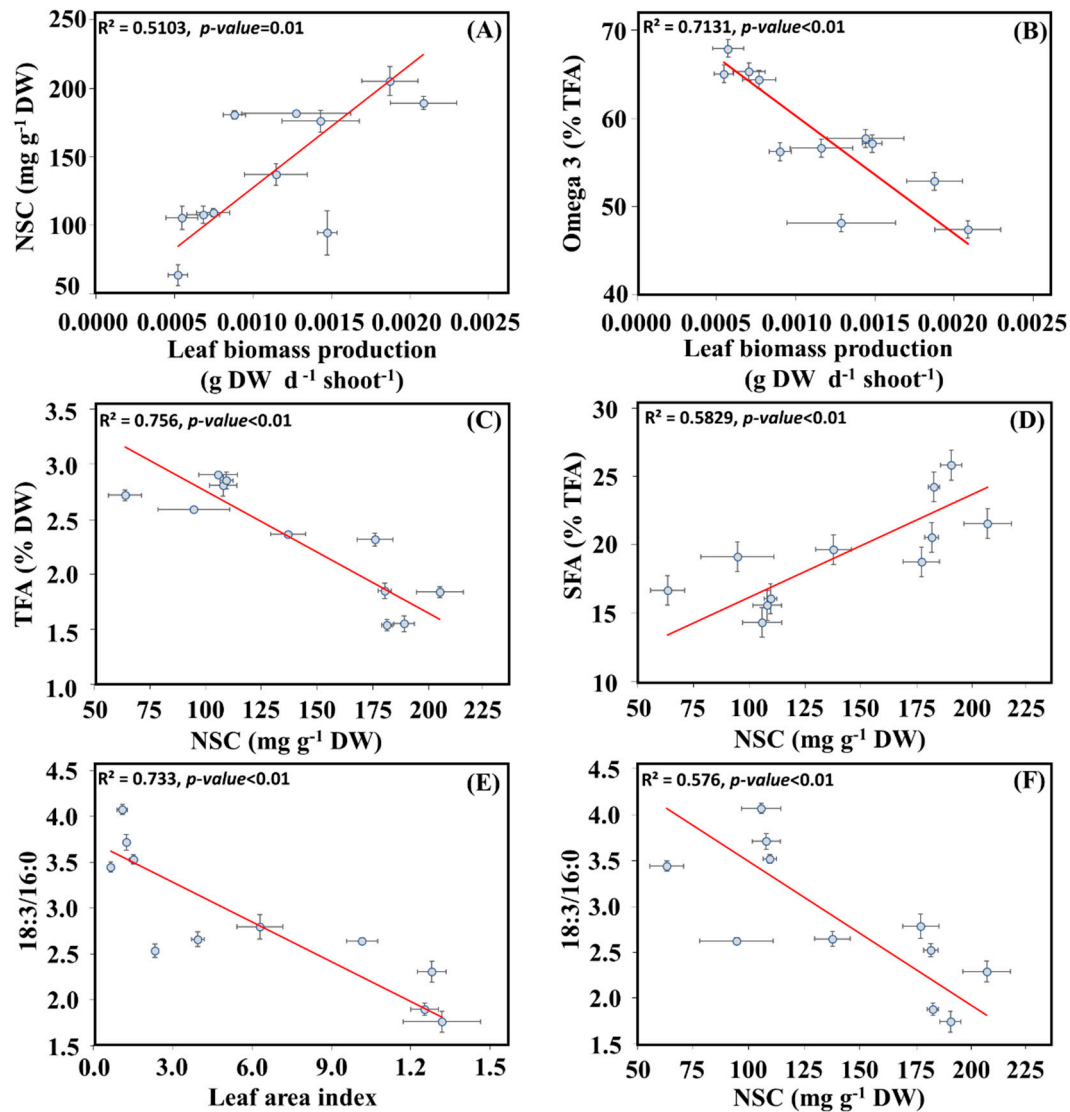

**Figure S4.** *Z. marina* ecotype (ZM1) in Galway Bay. Deming correlation of non-structural carbohydrates (NSC) *versus* leaf biomass production (Panel A); omega 3 (n-3 PUFA) *versus* leaf biomass production (Panel B); total fatty acids (TFA) *versus* non-structural carbohydrates (NSC) (Panel C); saturated fatty acids (SFAs) *versus* non-structural carbohydrates (NSC) (Panel D); 18:3/16:0 ratio *versus* leaf area index (Panel E); 18:3/16:0 ratio *versus* non-structural carbohydrates (NSC) (Panel F). Red lines represent the Deming regression line (n=12).

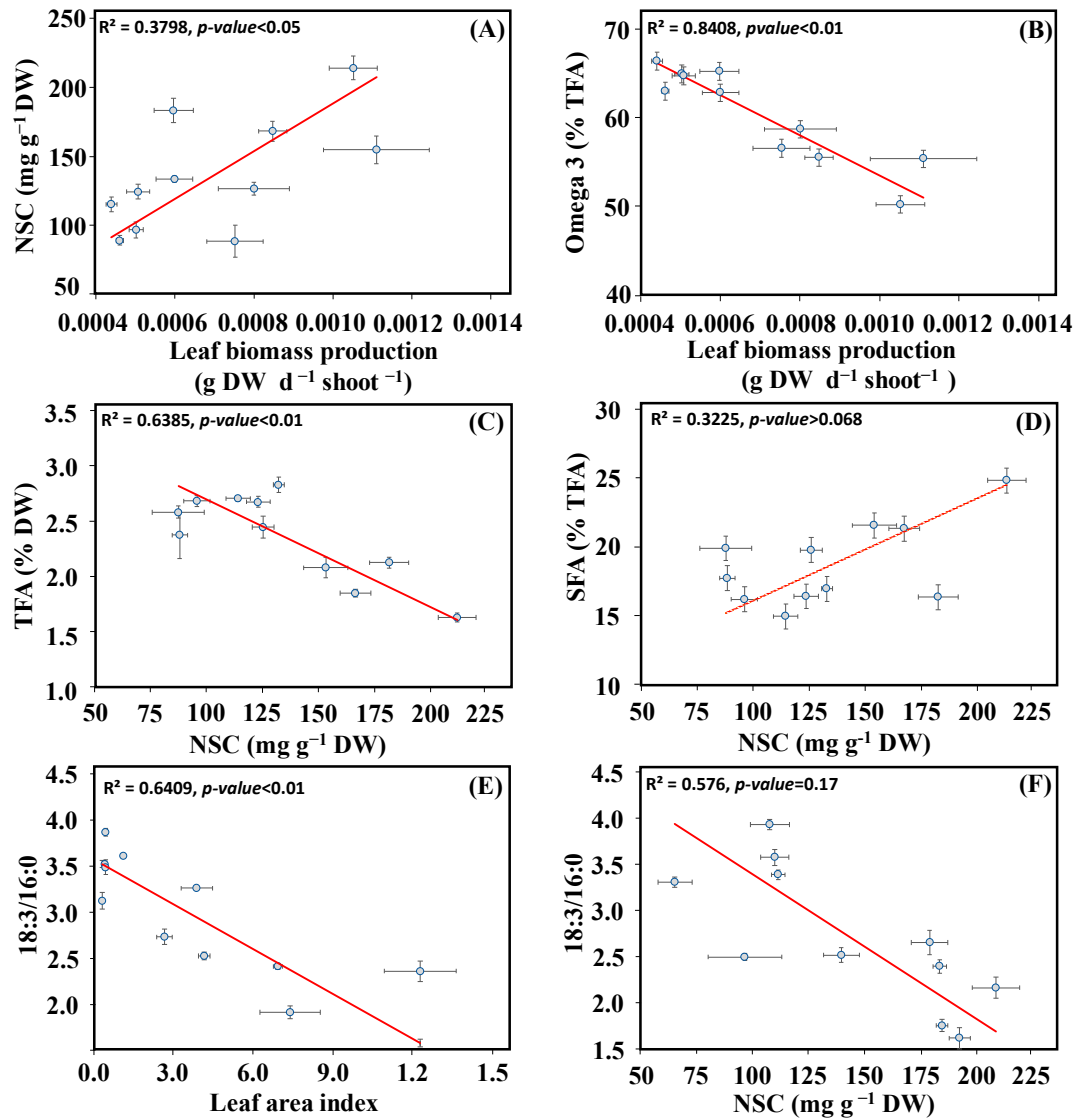

**Figure S5.** *Z. marina* ecotype (ZM2) in Galway Bay. Deming correlation of non-structural carbohydrates (NSC) *versus* leaf biomass production (Panel A); omega 3 (n-3 PUFA) *versus* leaf biomass production (Panel B); total fatty acids (TFA) *versus* non-structural carbohydrates (NSC) (Panel C); saturated fatty acids (SFAs) *versus* non-structural carbohydrates (NSC) (Panel D); 18:3/16:0 ratio *versus* leaf area index (Panel E); 18:3/16:0 ratio *versus* non-structural carbohydrates (NSC) (Panel F). Red lines represent the Deming regression line (n=12).
